# Supplementary material for: Anti-complement component 5 antibody targeting MG4 domain inhibits choroidal neovascularization
Source: PubMed Central journal article supplement (PMC5542204; doi:10.18632/oncotarget.17221), 2017-04-19
Supplement: oncotarget-08-45506-s001.pdf [file oncotarget-08-45506-s001.pdf]

# Anti-complement component 5 antibody targeting MG4 domain inhibits choroidal neovascularization

## SUPPLEMENTARY FIGURES AND TABLES

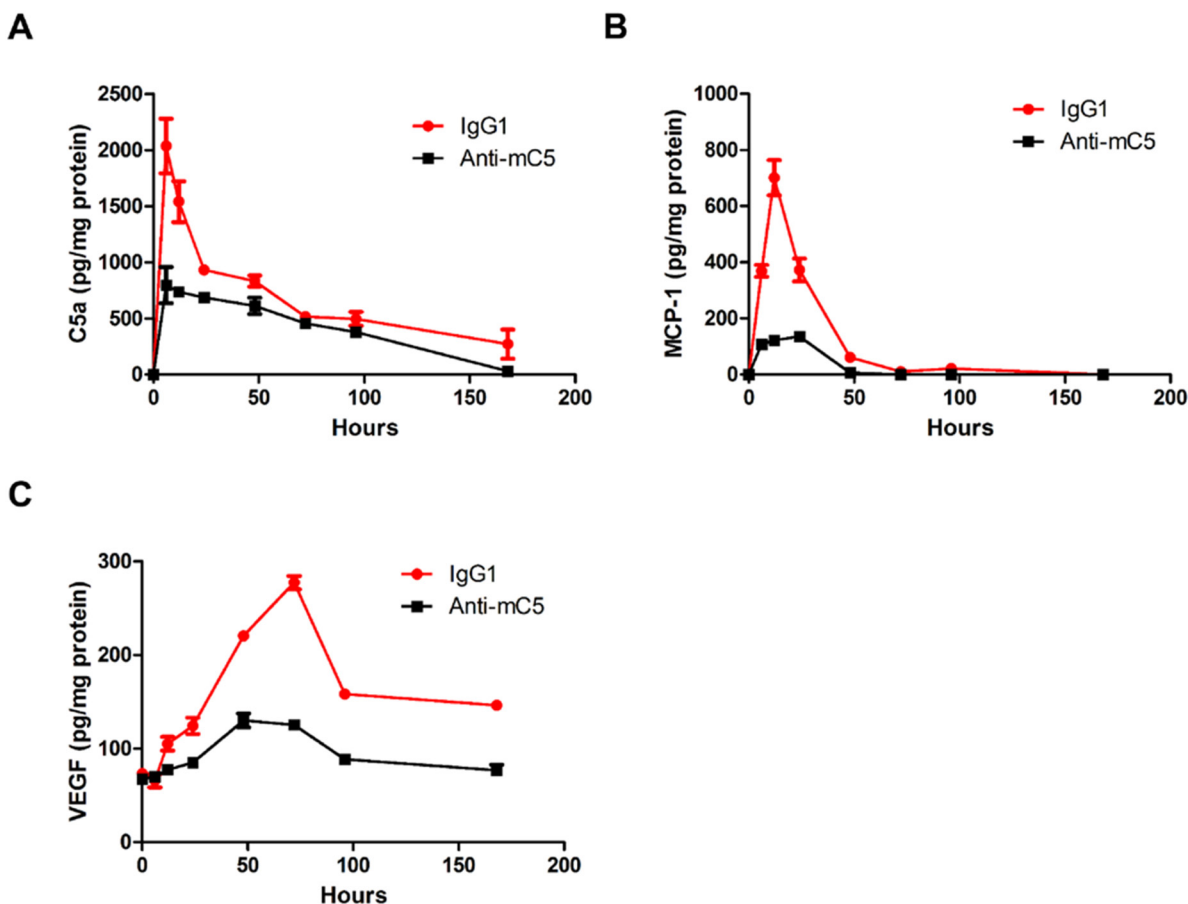

**Supplementary Figure 1: Anti-C5 antibody reduces production of C5a, MCP-1, and VEGF after laser photocoagulation.** A-C. The levels of C5a (A), MCP-1 (B), and VEGF (C) in RPE-choroid-scleral complexes. Anti-mC5, anti-C5 antibody; IgG1, IgG1 isotype control.

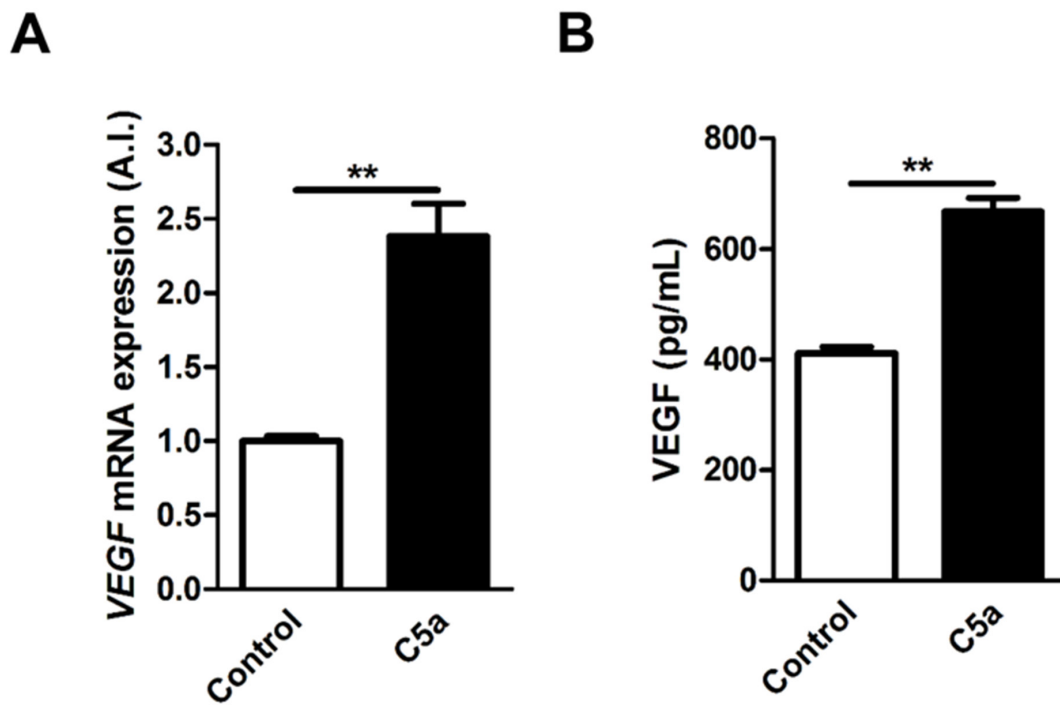

**Supplementary Figure 2: C5a promotes the expression and secretion of VEGF in ARPE-19 cells.** (A) Relative VEGF mRNA expression according to the treatment with C5a. (B) Amounts of VEGF in conditioned media according to the treatment with C5a. \*\*, *P*-value < 0.01 (Mann-Whitney U-test).

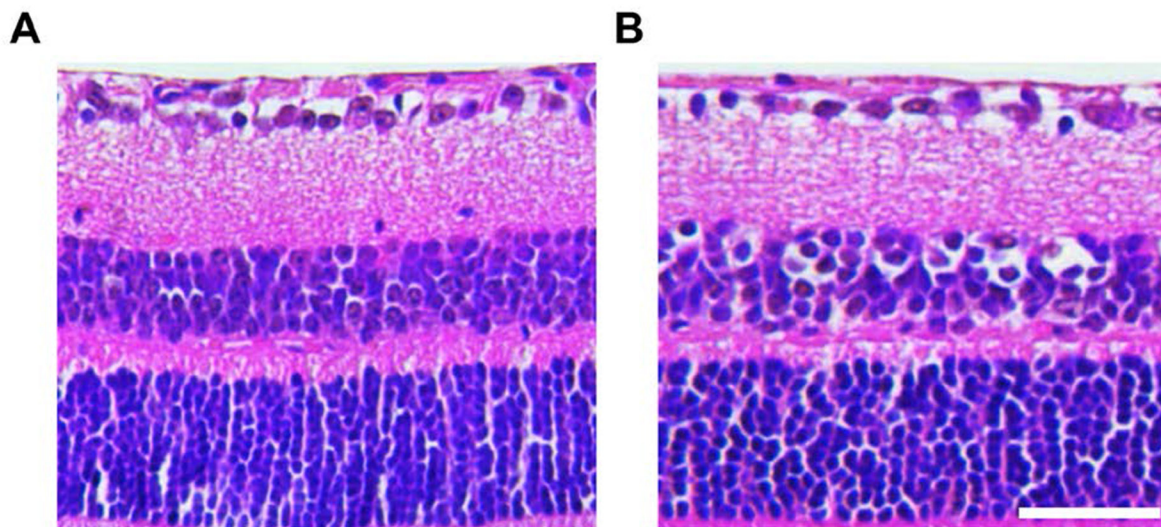

**Supplementary Figure 3: Anti-C5 antibody does not induce definite histologic toxicity in the normal retina.** (A and B) Representative H&E images of mice treated with (A) IgG1 isotype control and (B) anti-C5 antibody (10  $\mu\text{g}/\text{eye}$ ; 10 times the therapeutic dose in this study). Scale bar, 50  $\mu\text{m}$ .

**Supplementary Table 1: The list of differentially expressed genes (total 5 genes; > 2 fold and *P*-value < 0.05) in the retina by intravitreal injection of anti-C5 antibody (1 µg/eye; the therapeutic dose in this study)**

| <b>Gene symbol</b> | <b>Fold change</b> | <b><i>P</i>-value</b> | <b>Gene description</b>    |
|--------------------|--------------------|-----------------------|----------------------------|
| Gm20738            | 2.003              | 0.04321685            | predicted gene, 20738      |
| Gm20830            | 3.010              | 0.03594047            | predicted gene, 20830      |
| Mir466g            | 0.403              | 0.01616836            | microRNA 466g              |
| Mir669n            | 0.384              | 0.01081764            | microRNA 669n              |
| Vmn1r157           | 2.548              | 0.02041716            | vomeronasal 1 receptor 157 |

**Supplementary Table 2: The list of differentially expressed genes (total: 68 genes; > 2 fold and *P*-value < 0.05) in the retina by intravitreal injection of anti-C5 antibody (10 µg/eye; 10 times the therapeutic dose in this study)**

See Supplementary File 1
